# Supplementary material for: Diversity, Abundance, and Ecological Roles of Planktonic Fungi in Marine Environments
Source: MDPI journal article supplement (doi:10.3390/jof8050491), 2022-05-08
Supplement: s1 [file s1]

**Table S1.** Culturable and molecular studies on fungi in the sediments of different oceanic regions.

| Oceanic region      | Type of sample                           | Reference                                                            |
|---------------------|------------------------------------------|----------------------------------------------------------------------|
| Bay of Bengal       | Sediments                                | Velmurugan et al. (2013)                                             |
| Arabian Sea         | Oxygen minimum zone, sediments           | Jebaraj et al. (2010)                                                |
| Mariana Trench      | Deep-sea mud                             | Takami et al. (1997)                                                 |
| Chagos Trench       | Deep-sea sediments                       | Raghukumar et al. (2004)                                             |
| Central India Basin | Deep-sea sediments (5000 m)              | Damare et al. (2006);<br>Singh et al. (2010);<br>Singh et al. (2012) |
| East Indian Ocean   | Deep-sea sediment (4000 m)               | Zhang et al. (2014)                                                  |
| South China Sea     | Deep-sea sediment (2400-4000 m)          | Zhang et al. (2013)                                                  |
| Suruga Bay          | Marine sub-surface sediments (3-40 mbsf) | Nagano et al. (2016)                                                 |
| White Sea           | Bottom soil (10-30 m)                    | Khusnullina et al. (2018)                                            |
| Delaware Bay        | Sediment (2-4 cmbsf)                     | Burgaud et al. (2013)                                                |
| Admiralty Bay       | Sediment                                 | Wentzel et al. (2019)                                                |
| Canterbury basin    | Deep-Subseafloor sediment                | Rédou et al. (2015)                                                  |
| East Pacific Ocean  |                                          | Wei et al. (2018)                                                    |

[10,11,13,51,78]

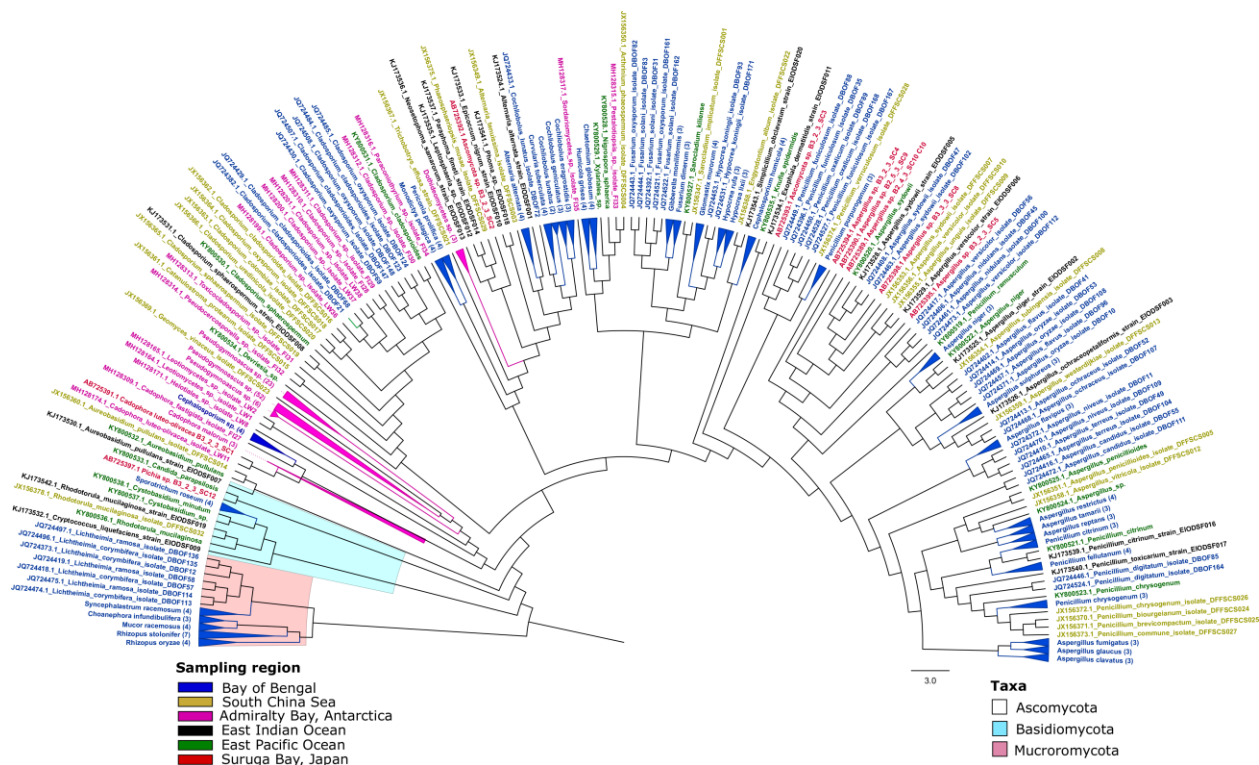

**Figure S1.** Maximum-Likelihood (ML) tree of the culturable fungi isolated from marine sediment. A total of 348 ITS sequences of culturable fungi isolated from sediments across the globe were retrieved from the NCBI Nucleotide database. Sequences in the tree were aligned with MUSCLE using default settings. Phylogenetic analysis was performed using FastTree2.1 software for the construction of the ML tree, which uses the Shimodaira-Hasegawa test to estimate the reliability of each split in the tree.
